# Supplementary material for: From Genome to Structure and Back Again: A Family Portrait of the Transcarbamylases
Source: PubMed Central journal article supplement (PMC4581275; doi:10.3390/ijms160818836), 2015-08-12
Supplement: ijms-16-18836-s001.pdf [file ijms-16-18836-s001.pdf]

## Supplementary Information

**Table S1.** Structures for the members of the transcarbamylase family deposited in PDB.

| Protein | Source         | Note                             | Ligands                          | PDB ID                                                                       | Resolution (Å) | Reference |
|---------|----------------|----------------------------------|----------------------------------|------------------------------------------------------------------------------|----------------|-----------|
| ATCase  | <i>E. coli</i> | R54A mutant                      | Zn(II), PALA                     | 1ACM                                                                         | 2.8            | [89]      |
|         |                | R-state                          | Zn(II),<br>PAM,<br>Malonate      | 1AT1                                                                         | 2.8            | [90]      |
|         |                | R-state                          | PALA                             | 1D09                                                                         | 2.01           | [91]      |
|         |                | Catalytic trimer                 | PALA                             | 1EKX                                                                         | 1.95           | [41]      |
|         |                | P268A mutant<br>T-state          | Zn(II)                           | 1EZZ                                                                         | 2.70           | [92]      |
|         |                | P268A mutant<br>R-state          | PALA,<br>Zn(II)                  | 1F1B                                                                         | 2.30           | [92]      |
|         |                | R105A mutant<br>Catalytic trimer |                                  | 1GQ3                                                                         | 2.01           |           |
|         |                | R105A mutant                     | PALA,<br>Zn(II)                  | 1I5O                                                                         | 2.80           | [93]      |
|         |                | T82A mutant                      | Malic acid,<br>Zn(II)            | 1NBE                                                                         | 2.60           | [94]      |
|         |                | R-state                          | PALA,<br>Zn(II)                  | 1Q95                                                                         | 2.46           | [95]      |
|         |                | R-state                          | Citrate,<br>Zn(II),<br>Phosphate | 1R0B                                                                         | 2.90           | [95]      |
|         |                | T-state                          | Zn(II),<br>Phosphate,<br>NCD     | 1R0C                                                                         | 2.37           | [96]      |
|         |                | T-state                          | CTP                              | 1RAA,<br>1RAB,<br>1RAC,<br>1RAD,<br>1RAE,<br>1RAF,<br>1RAG,<br>1RAH,<br>1RAI | 2.50           | [97]      |
|         |                | K244N mutant                     | Malonate,<br>Zn(II)              | 1SKU                                                                         | 2.60           | [98]      |
|         |                | E50A mutant                      | PALA,<br>Zn(II)                  | 1TTH                                                                         | 2.80           | [99]      |
|         |                | E50A mutant                      | PAM,<br>Zn(II)                   | 1TU0                                                                         | 2.55           | [99]      |
|         |                | E50A mutant                      | PAM,<br>Malonate,<br>CTP, Zn(II) | 1TUG                                                                         | 2.10           | [99]      |

Table S1. *Cont.*

| Protein | Source | Note             | Ligands                             | PDB ID | Resolution (Å) | Reference   |
|---------|--------|------------------|-------------------------------------|--------|----------------|-------------|
|         |        | Q137A mutant     | PALA,<br>Zn(II)                     | 1XJW   | 2.71           | [100]       |
|         |        |                  | CTP,<br>Zn(II)                      | 1ZA1   | 2.20           | [71]        |
|         |        |                  | CTP,<br>CP,<br>Zn(II)               | 1ZA2   | 2.50           | [71]        |
|         |        | D236A mutant     | PAM,<br>Zn(II)                      | 2A0F   | 2.90           | [101]       |
|         |        |                  | PAM,<br>Malonate,<br>Zn(II)         | 1AT1   | 2.80           | [90]        |
|         |        |                  | Zn(II)                              | 2ATC   | 3.00           | [102]       |
|         |        |                  | PAM,<br>Zn(II)                      | 3AT1   | 2.80           | [90]        |
|         |        | Catalytic trimer |                                     | 3CSU   | 1.88           | [40]        |
|         |        |                  | ATP,<br>Zn(II)                      | 4AT1   | 2.60           | [103]       |
|         |        |                  | CTP,<br>Zn(II)                      | 5AT1   | 2.60           | [103]       |
|         |        |                  | Zn(II)                              | 6AT1   | 2.60           | [103]       |
|         |        |                  | PAM,<br>Malonate,<br>ATP,<br>Zn(II) | 7AT1   | 2.80           | [103]       |
|         |        |                  | PAM,<br>Malonate,<br>CTP,<br>Zn(II) | 8AT1   | 2.80           | [103]       |
|         |        |                  | PALA,<br>Zn(II)                     | 8ATC   | 2.50           | [104]       |
|         |        |                  | Zn(II)                              | 9ATC   | 2.40           | [105]       |
|         |        |                  | CP,<br>Alanosine                    | 2AIR   | 2.00           | [106]       |
|         |        | T-state          | CTP,<br>EOA                         | 2FZC   | 2.46           | [107]       |
|         |        | T-state          | CTP, EOB                            | 2FZG   | 2.25           | [107]       |
|         |        |                  | CTP,<br>EOZ                         | 2FZK   | 2.50           | [107]       |
|         |        | R-state          | PALI                                | 2IPO   | 2.60           | [108]       |
|         |        | R-state          | PALI                                | 2H3E   | 2.30           | [109]       |
|         |        | R-sate<br>D236A  | PAM,<br>aspartate                   | 2HSE   | 2.60           | Unpublished |

Table S1. Cont.

| Protein                  | Source         | Note                  | Ligands                        | PDB ID | Resolution<br>(Å) | Reference   |
|--------------------------|----------------|-----------------------|--------------------------------|--------|-------------------|-------------|
|                          |                | rH20A                 |                                | 2QGF   | 2.20              | [110]       |
|                          |                | rD19A                 |                                | 2PG9   | 2.70              | [110]       |
|                          |                | pH = 8.5              |                                | 3D7S   | 2.80              | [111]       |
|                          |                | R-state               | ATP                            | 4KGV   | 2.10              | [112]       |
|                          |                | R-state               | CTP                            | 4KGX   | 2.20              | [112]       |
|                          |                | R-state               | ATP, Mg <sup>2+</sup>          | 4KH0   | 2.25              | [112]       |
|                          |                |                       | dCTP                           | 4FYV   | 2.10              | [113]       |
|                          |                |                       | CTP                            | 4FYX   | 2.10              | [113]       |
|                          |                |                       | dCTP, CTP,<br>Mg <sup>2+</sup> | 4FYW   | 2.10              | [113]       |
|                          |                | R-state               | UTP                            | 4F04   | 2.30              | [114]       |
|                          |                | K164E/E239K           |                                | 4E2F   | 2.80              | [115]       |
|                          |                | C47A/A241C            |                                | 3NPM   | 2.10              | [116]       |
|                          |                | Natural source        |                                | 4WTO   | 2.30              | Unpublished |
|                          |                | C47A/A241C            |                                | 3MPU   | 2.86              | [116]       |
| <i>M. jannaschii</i>     |                | Regulatory dimer      | ATP                            | 2YWW   | 2.00              | Unpublished |
|                          |                | Catalytic trimer      |                                | 2RGW   |                   | [46]        |
|                          |                | Catalytic trimer      |                                | 3E2P   | 3.0               | [45]        |
|                          |                |                       |                                | 4EKN   | 2.50              | [47]        |
| <i>M. profunda</i>       |                | V2A<br>T-state        |                                | 2BE7   | 2.85              | [48]        |
| <i>P. abyssi</i>         |                | Catalytic trimer      | PALA                           | 1ML4   | 1.80              | [42]        |
| <i>S. acidocaldarius</i> |                | T-state               | Zn(II)                         | 1PG5   | 2.60              | [43]        |
|                          |                | T-state               | CTP                            | 2BE9   | 2.60              | [44]        |
| <i>A. aeolicus</i>       |                | Complexed with<br>DHO |                                | 3D6N   | 2.3               | [50]        |
|                          |                | Complexed with<br>DHO | PALA                           | 4BJH   | 2.2               | [51]        |
| <i>B. subtilis</i>       |                | Catalytic trimer      |                                | 2AT2   | 3.0               | [7]         |
|                          |                |                       |                                | 3R7D   | 2.2               | [49]        |
|                          |                |                       | CP                             | 3R7F   | 2.10              | [49]        |
|                          |                |                       | PALA                           | 3R7L   | 2.59              | [49]        |
| <i>T. cruzi</i>          |                | Catalytic trimer      |                                | 4IV5   | 2.10              | Unpublished |
| <i>Y. pestis</i>         |                | Catalytic trimer      |                                | 3LXM   | 2.0               | Unpublished |
| aOTCase                  | <i>E. coli</i> | Trimer                |                                | 1AKM   | 2.8               | [54]        |
|                          |                |                       | Psorn                          | 1DUV   | 1.7               | [53]        |
|                          |                |                       | PALO                           | 2OTC   | 2.80              | [52]        |
|                          | Human          | Trimer                | CP,<br>Norvaline               | 1C9Y   | 1.90              | [117]       |
|                          |                |                       | CP                             | 1EP9   | 2.40              | [60]        |

Table S1. Cont.

| Protein | Source                  | Note      | Ligands         | PDB ID | Resolution<br>(Å) | Reference   |
|---------|-------------------------|-----------|-----------------|--------|-------------------|-------------|
|         |                         |           | CP              | 1FVO   | 2.60              | [60]        |
|         |                         |           | PALO            | 1OTH   | 1.85              | [58]        |
|         | Ovine                   | Trimer    |                 | 1FB5   | 3.50              | [61]        |
|         | <i>B. anthracis</i>     | Trimer    | CP, norvaline   | 4NF2   | 1.74              | Unpublished |
|         |                         |           |                 | 4EP1   | 3.25              | Unpublished |
|         | <i>V. vulnificus</i>    | Trimer    |                 | 4KWT   | 1.86              | Unpublished |
|         |                         | Trimer    | Pi, Citrulline  | 4JQO   | 2.08              | Unpublished |
|         |                         |           | CP, arginine    | 4JHX   | 1.85              | Unpublished |
|         |                         |           | CP              | 4JFR   | 2.17              | Unpublished |
|         |                         |           | CP, norvaline   | 4H31   | 1.70              | Unpublished |
|         |                         |           |                 | 3UPD   | 2.90              | Unpublished |
|         | <i>T. thailandensis</i> |           | Pi              | 4F2G   | 2.10              | [118]       |
|         | <i>Py. furiosus</i>     | Dodecamer | Phosphate       | 1A1S   | 2.70              | [57]        |
|         |                         |           |                 | 1PVV   | 1.87              | [77]        |
|         | <i>T. maritima</i>      | Dodecamer | Phosphate       | 1VLV   | 2.25              | Unpublished |
|         | <i>T. thermophilus</i>  | Trimer    |                 | 2EF0   | 2.0               | Unpublished |
|         | <i>M. tuberculosis</i>  | Trimer    | CP<br>Norvaline | 2I6U   | 2.2               | [119]       |
|         |                         | Trimer    |                 | 2P2G   | 2.7               | [119]       |
|         | <i>G. lamblia</i>       | Trimer    | PALO            | 3GRF   | 2.0               | [120]       |
|         | <i>C. jejuni</i>        | Trimer    |                 | 3TPF   | 2.70              | [121]       |
|         | <i>C. immitis</i>       |           |                 | 3SDS   | 2.80              | [122]       |
|         | <i>B. melitensis</i>    | Trimer    |                 | 4OH7   | 1.50              | Unpublished |
|         | <i>G. violaceus</i>     | hexamer   |                 | 3GD5   | 2.10              | Unpublished |
| cOTCase | <i>Ps. aeruginosa</i>   | Dodecamer | Phosphate       | 1DXH   | 2.50              | Unpublished |
|         |                         |           |                 | 1ORT   | 3.0               | [55]        |
|         | <i>M. penetrans</i>     | Dodecamer |                 | 4AMU   | 2.5               | [19]        |
|         |                         |           |                 | 4ANF   | 2.6               | [19]        |
|         | <i>L. hilgardii</i>     | Hexamer   |                 | 2W37   | 2.1               | [20]        |
| AOTCase | <i>X. campestris</i>    | Trimer    | Sulfate         | 3KZC   | 2.20              | [21]        |
|         |                         |           | ACT,<br>Sulfate | 3KZK   | 1.90              | [21]        |
|         |                         |           | CP              | 3KZM   |                   | [62]        |
|         |                         |           | AORN            | 3KZN   |                   | [62]        |
|         |                         |           | CP,<br>ANOR     | 3KZO   |                   | [62]        |
|         |                         | E92A      | CP,<br>SNOR     | 3L02   | 2.30              | [25]        |
|         |                         | E92P      | CP, SNOR        | 3L04   | 2.50              | [25]        |
|         |                         | E92S      | CP,<br>SNOR     | 3L05   | 2.80              | [25]        |

Table S1. *Cont.*

| Protein | Source             | Note    | Ligands          | PDB ID | Resolution (Å) | Reference   |
|---------|--------------------|---------|------------------|--------|----------------|-------------|
|         |                    | E92V    | CP,<br>SNOR      | 3L06   | 2.81           | [25]        |
|         |                    |         | PALAO            | 3M4J   | 2.2            | [123]       |
|         |                    | K302A   | PALAO            | 3M4N   | 1.9            | [123]       |
|         |                    | K302E   | PALAO            | 3M5C   | 1.85           |             |
| SOTCase | <i>B. fragilis</i> | Trimer  | Phosphate        | 1JS1   | 2.0            | [23]        |
|         |                    |         | Sulfate,<br>SNOR | 2FG6   | 2.80           | [24]        |
|         |                    |         | CP,<br>SNOR      | 2FG7   | 2.90           | [24]        |
|         |                    | P90E    | CP,<br>ANOR      | 2G7M   | 2.90           | [25]        |
| PTCase  | <i>E. faecalis</i> | R54G    | Guanidinine      | 4AM8   | 1.99           | Unpublished |
|         |                    | Trimer  | PALP             | 4A8H   | 2.50           | [29]        |
|         |                    |         | PALO             | 4A8P   | 2.00           | [29]        |
|         |                    | Hexamer | PALO             | 4A8T   | 1.59           | [29]        |
|         |                    | Trimer  |                  | 3TXX   | 3.20           | [30]        |
| YTCase  | <i>E. coli</i>     | Trimer  |                  | 3Q98   | 2.0            | [32]        |
|         | <i>E. faecalis</i> | Trimer  |                  | 2YFK   | 2.55           | Unpublished |
|         |                    |         | CP               | 2YFF   |                | Withdrawn   |
|         |                    |         | CP + Taurine     | 2YFM   |                | Withdrawn   |
